# Supplementary material for: Characterization of novel genomic alterations and therapeutic approaches using acute megakaryoblastic leukemia xenograft models
Source: PubMed Central journal article supplement — J Exp Med. 2012 Oct 22;209(11):2017–31. doi: 10.1084/jem.20121343 (PMC3478932; doi:10.1084/jem.20121343), 2012-10-22
Supplement: supp_jem.20121343_JEM_20121343_sm.pdf [file supp_jem.20121343_JEM_20121343_sm.pdf]

SUPPLEMENTAL MATERIAL

Thiollier et al., <http://www.jem.org/cgi/content/full/jem.20121343/DC1>

**Table S1.** Class comparison between OTT-MAL, CBFA2T3-GLIS2, and other non-DS AMKLs

| Gene name | Geometric mean of intensities |               |         | Parametric p-value | FDR      | Permutation p-value |
|-----------|-------------------------------|---------------|---------|--------------------|----------|---------------------|
|           | Other non-DS AMKLs            | CBFA2T3-GLIS2 | OTT-MAL |                    |          |                     |
| NCAM1     | 60.72                         | 2324.27       | 68.73   | < 1e-07            | < 1e-07  | 1,00E-04            |
| NCAM1     | 50.18                         | 340.19        | 50.75   | < 1e-07            | < 1e-07  | 1,00E-04            |
| CLSTN2    | 39.1                          | 103.45        | 45.55   | < 1e-07            | < 1e-07  | 1,00E-04            |
| PLS3      | 16.05                         | 60.92         | 16.28   | < 1e-07            | < 1e-07  | 1,00E-04            |
| TGM2      | 63.8                          | 275.05        | 65.73   | < 1e-07            | < 1e-07  | 1,00E-04            |
| IMPDH2    | 1256.59                       | 5983.17       | 1121.64 | < 1e-07            | < 1e-07  | 1,00E-04            |
| DOK5      | 104.18                        | 603.64        | 95.99   | < 1e-07            | < 1e-07  | 1,00E-04            |
| ABHD4     | 294.3                         | 736           | 296.14  | < 1e-07            | < 1e-07  | 1,00E-04            |
| LTC4S     | 58.93                         | 543.94        | 88.75   | < 1e-07            | < 1e-07  | 1,00E-04            |
| ACE2      | 46.79                         | 437.47        | 44.88   | < 1e-07            | < 1e-07  | 1,00E-04            |
| TGM2      | 96.39                         | 501.38        | 93.06   | < 1e-07            | < 1e-07  | 1,00E-04            |
| CRISP3    | 22.59                         | 1028.44       | 15.61   | < 1e-07            | < 1e-07  | 1,00E-04            |
| TAOK3     | 188.71                        | 58.56         | 161.44  | < 1e-07            | < 1e-07  | 1,00E-04            |
| NOS1AP    | 129.7                         | 270.51        | 141.66  | < 1e-07            | < 1e-07  | 1,00E-04            |
| SEMA3G    | 49.15                         | 109.38        | 56.24   | < 1e-07            | < 1e-07  | < 1e-07             |
| ACE2      | 15.67                         | 264.51        | 15.15   | < 1e-07            | < 1e-07  | 1,00E-04            |
| IGFBP7    | 659.88                        | 5022.23       | 286.15  | 1,00E-07           | 0.000106 | < 1e-07             |
| BLMH      | 210.21                        | 85.68         | 165.8   | 1,00E-07           | 0.000106 | < 1e-07             |
| PRKCB     | 619.79                        | 125.71        | 785.24  | 1,00E-07           | 0.000106 | < 1e-07             |
| LGR4      | 17.64                         | 84.21         | 14.88   | 1,00E-07           | 0.000106 | 1,00E-04            |
| SMAD3     | 293.54                        | 1040.53       | 268.14  | 1,00E-07           | 0.000106 | 1,00E-04            |
| FDXR      | 59.89                         | 107.81        | 63.85   | 2,00E-07           | 0.000159 | < 1e-07             |
| H2AFY     | 1341.83                       | 4827.7        | 1066.09 | 2,00E-07           | 0.000159 | < 1e-07             |
| PTPN6     | 1178.66                       | 213.63        | 596.94  | 2,00E-07           | 0.000159 | < 1e-07             |
| LBR       | 287.22                        | 67.77         | 340.17  | 2,00E-07           | 0.000159 | < 1e-07             |
| MARCH3    | 53.88                         | 222.82        | 84.08   | 2,00E-07           | 0.000159 | < 1e-07             |
| AFF1      | 562.03                        | 191.1         | 544.81  | 2,00E-07           | 0.000159 | 1,00E-04            |
| FOLR1     | 75.54                         | 197.59        | 76.28   | 2,00E-07           | 0.000159 | 1,00E-04            |
| MYO6      | 46.28                         | 257.99        | 79.58   | 3,00E-07           | 0.000209 | < 1e-07             |
| CD33      | 236.4                         | 629.67        | 172.29  | 3,00E-07           | 0.000209 | < 1e-07             |
| MYH6      | 18.05                         | 32.41         | 18.37   | 3,00E-07           | 0.000209 | 1,00E-04            |
| PRKCB     | 318.9                         | 52.76         | 442.15  | 3,00E-07           | 0.000209 | < 1e-07             |
| HK1       | 735.88                        | 219.67        | 886.27  | 4,00E-07           | 0.000262 | < 1e-07             |
| DPYSL2    | 171.21                        | 408.67        | 77.25   | 4,00E-07           | 0.000262 | < 1e-07             |
| HEBP1     | 199.2                         | 61.29         | 129.11  | 5,00E-07           | 0.000318 | < 1e-07             |
| RAB33A    | 63.11                         | 189.27        | 78.9    | 6,00E-07           | 0.000361 | < 1e-07             |
| IGFBP2    | 44.7                          | 224.93        | 69.87   | 6,00E-07           | 0.000361 | < 1e-07             |
| PVRL3     | 22.39                         | 40.92         | 23.1    | 7,00E-07           | 0.00039  | 1,00E-04            |
| CASP3     | 93.33                         | 367.11        | 99.39   | 7,00E-07           | 0.00039  | 1,00E-04            |
| PTGER3    | 49.04                         | 31.51         | 157.69  | 7,00E-07           | 0.00039  | < 1e-07             |
| URG4      | 173.89                        | 98.72         | 175.09  | 8,00E-07           | 0.000435 | 1,00E-04            |
| H2AFY     | 1514.99                       | 4415.69       | 1206.67 | 9,00E-07           | 0.000466 | < 1e-07             |
| C2CD2L    | 96.87                         | 155.9         | 126.33  | 9,00E-07           | 0.000466 | < 1e-07             |
| HOPX      | 92.38                         | 973.76        | 64.3    | 1.1e-06            | 0.000557 | 1,00E-04            |
| HCLS1     | 1057.08                       | 198.02        | 821.25  | 1.2e-06            | 0.000594 | < 1e-07             |
| SLC16A1   | 264.07                        | 111.14        | 277.48  | 1.4e-06            | 0.000664 | 1,00E-04            |
| NA        | 21.52                         | 35.62         | 22.05   | 1.4e-06            | 0.000664 | 1,00E-04            |
| CD37      | 935.44                        | 167.71        | 583.02  | 1.6e-06            | 0.000743 | 1,00E-04            |
| MYO6      | 53.63                         | 111.24        | 66.44   | 2.2e-06            | 0.001    | < 1e-07             |
| MAST4     | 37.57                         | 96.28         | 49.7    | 2.3e-06            | 0.00103  | < 1e-07             |

|          |         |         |         |          |         |          |
|----------|---------|---------|---------|----------|---------|----------|
| SERP1    | 232.36  | 105.24  | 171.66  | 2.6e-06  | 0.00114 | < 1e-07  |
| GAS2L1   | 147.97  | 79.7    | 251.63  | 2.7e-06  | 0.00116 | < 1e-07  |
| HARS2    | 96.79   | 186.97  | 133     | 3,00E-06 | 0.00126 | 1,00E-04 |
| CSTB     | 802.12  | 180.37  | 643.4   | 3.6e-06  | 0.00149 | < 1e-07  |
| PQLC1    | 233.98  | 91.85   | 216.29  | 3.7e-06  | 0.0015  | 1,00E-04 |
| NOTCH2   | 452.58  | 80.58   | 315.95  | 3.9e-06  | 0.00154 | 1,00E-04 |
| TGM2     | 51.61   | 173.02  | 55.51   | 4,00E-06 | 0.00154 | 3,00E-04 |
| CD59     | 296.6   | 97.1    | 116.89  | 4,00E-06 | 0.00154 | < 1e-07  |
| ME3      | 190     | 85.18   | 105.03  | 4.3e-06  | 0.00162 | < 1e-07  |
| PPDPF    | 294.28  | 90.76   | 340.7   | 4.5e-06  | 0.00167 | 1,00E-04 |
| IGFBP7   | 27.89   | 72.24   | 24.32   | 4.7e-06  | 0.00172 | 3,00E-04 |
| PHACTR2  | 135.01  | 51.77   | 138.11  | 4.8e-06  | 0.00173 | < 1e-07  |
| MFNG     | 554.87  | 128.26  | 542.9   | 5.3e-06  | 0.00187 | 1,00E-04 |
| CYBA     | 994.09  | 431.97  | 775.52  | 5.5e-06  | 0.00191 | 1,00E-04 |
| NA       | 45.41   | 241.55  | 55.8    | 5.6e-06  | 0.00192 | 6,00E-04 |
| NA       | 17.63   | 25.72   | 19.25   | 5.7e-06  | 0.00192 | 1,00E-04 |
| IGFBP7   | 151.69  | 1156.41 | 70.53   | 5.9e-06  | 0.00196 | 3,00E-04 |
| GREB1    | 12.09   | 19.02   | 12.85   | 6,00E-06 | 0.00197 | 1,00E-04 |
| MRC2     | 101.19  | 154.82  | 98.68   | 6.8e-06  | 0.0022  | 1,00E-04 |
| NIPSNAP1 | 559.69  | 320.59  | 460.53  | 7.5e-06  | 0.00235 | < 1e-07  |
| ASPH     | 19.3    | 30.54   | 21.09   | 7.6e-06  | 0.00235 | < 1e-07  |
| KIAA0323 | 186.89  | 77.79   | 166.75  | 7.7e-06  | 0.00235 | 1,00E-04 |
| PLEKHG3  | 194.02  | 353.67  | 181.93  | 7.7e-06  | 0.00235 | 2,00E-04 |
| ODC1     | 1230.82 | 357.56  | 1277.35 | 8.3e-06  | 0.0025  | 3,00E-04 |
| PEX3     | 22.55   | 78.25   | 30.49   | 8.6e-06  | 0.00253 | 2,00E-04 |
| NBL1     | 227.97  | 427.69  | 215.08  | 8.7e-06  | 0.00253 | 1,00E-04 |
| VDR      | 25.56   | 72.55   | 45.09   | 8.8e-06  | 0.00253 | 1,00E-04 |
| SERP1    | 1395.06 | 794.92  | 1378.54 | 8.9e-06  | 0.00253 | 1,00E-04 |
| SERP1    | 425.57  | 256.79  | 337.2   | 9.1e-06  | 0.00253 | 1,00E-04 |
| PHLDB1   | 130.28  | 181.21  | 120.79  | 9.1e-06  | 0.00253 | 1,00E-04 |
| KRT18    | 96.68   | 587.75  | 144.29  | 9.4e-06  | 0.00259 | 2,00E-04 |
| ABHD2    | 209.49  | 103.31  | 168.78  | 1.03e-05 | 0.00275 | 1,00E-04 |
| MOSC2    | 65.93   | 99.45   | 61.23   | 1.03e-05 | 0.00275 | 1,00E-04 |
| NA       | 58.13   | 80.97   | 62.15   | 1.04e-05 | 0.00275 | < 1e-07  |
| LHFP     | 44.81   | 182.51  | 89.07   | 1.06e-05 | 0.00275 | 3,00E-04 |
| CTBS     | 88.42   | 50.07   | 93      | 1.06e-05 | 0.00275 | 1,00E-04 |
| SALL2    | 197.68  | 422.13  | 244.48  | 1.12e-05 | 0.00283 | 3,00E-04 |
| GAS2L1   | 107.04  | 47.87   | 172.84  | 1.13e-05 | 0.00283 | < 1e-07  |
| WIT1     | 148.36  | 255.06  | 133.79  | 1.13e-05 | 0.00283 | < 1e-07  |
| SH3BGRL  | 730.98  | 415.54  | 433.23  | 1.21e-05 | 0.00295 | 1,00E-04 |
| CTSW     | 756.09  | 3102.96 | 951.33  | 1.22e-05 | 0.00295 | < 1e-07  |
| SH3BGRL  | 1283.88 | 646.32  | 841.96  | 1.22e-05 | 0.00295 | < 1e-07  |
| PHKG2    | 128.15  | 203.45  | 137.14  | 1.23e-05 | 0.00295 | < 1e-07  |
| ASPH     | 51.93   | 94.22   | 50.19   | 1.33e-05 | 0.00312 | 2,00E-04 |
| PEX3     | 113.06  | 470.79  | 159.08  | 1.34e-05 | 0.00312 | 3,00E-04 |
| RUNX1T1  | 21.88   | 85.63   | 49.06   | 1.35e-05 | 0.00312 | 1,00E-04 |
| RUFY1    | 274.48  | 1206.82 | 704.56  | 1.36e-05 | 0.00312 | 3,00E-04 |
| JAG1     | 30.48   | 62.71   | 31.09   | 1.37e-05 | 0.00312 | 3,00E-04 |
| NCK2     | 295.59  | 396.41  | 731.21  | 1.42e-05 | 0.0032  | < 1e-07  |
| DLGAP4   | 60.53   | 99.74   | 72.89   | 1.51e-05 | 0.00335 | 2,00E-04 |
| PRSS1    | 30.49   | 82.43   | 28.2    | 1.52e-05 | 0.00335 | 3,00E-04 |
| TGIF1    | 155.84  | 43.38   | 163.37  | 1.56e-05 | 0.0034  | 2,00E-04 |
| CRISP2   | 16.51   | 90.21   | 16.5    | 1.57e-05 | 0.0034  | 6,00E-04 |
| RUNX1T1  | 46.95   | 281.46  | 175.17  | 1.61e-05 | 0.00342 | 3,00E-04 |
| FLNA     | 279.56  | 300.54  | 631.29  | 1.61e-05 | 0.00342 | < 1e-07  |
| STAP2    | 88.13   | 136.01  | 82.3    | 1.73e-05 | 0.00364 | < 1e-07  |
| MAPRE2   | 610.83  | 261.51  | 770.45  | 1.76e-05 | 0.00365 | 2,00E-04 |
| NOTCH2   | 333.17  | 87.71   | 227.55  | 1.77e-05 | 0.00365 | < 1e-07  |
| MPP1     | 942.73  | 277.07  | 932.34  | 1.84e-05 | 0.00372 | 1,00E-04 |
| ABHD2    | 269.48  | 100.93  | 225.64  | 1.84e-05 | 0.00372 | 1,00E-04 |
| FAM69A   | 30.76   | 174.43  | 35.64   | 1.86e-05 | 0.00372 | 7,00E-04 |

|          |        |         |         |          |         |          |
|----------|--------|---------|---------|----------|---------|----------|
| DUSP14   | 83.37  | 143.59  | 112.28  | 1.87e-05 | 0.00372 | < 1e-07  |
| IRS2     | 497.46 | 278.37  | 3478.24 | 1.94e-05 | 0.00381 | 2,00E-04 |
| MOSC2    | 31.27  | 53.37   | 34.79   | 1.95e-05 | 0.00381 | 2,00E-04 |
| MAST4    | 323.7  | 882.63  | 393.07  | 1.97e-05 | 0.00382 | 3,00E-04 |
| NA       | 95.41  | 152.68  | 104.03  | 2.02e-05 | 0.00388 | < 1e-07  |
| TUBAL3   | 50.11  | 123.54  | 77.1    | 2.08e-05 | 0.0039  | 2,00E-04 |
| FLNA     | 306.31 | 303.49  | 697.12  | 2.09e-05 | 0.0039  | 1,00E-04 |
| DCK      | 48.74  | 22.95   | 39.35   | 2.11e-05 | 0.0039  | 1,00E-04 |
| MYO6     | 16.05  | 42.35   | 20.81   | 2.11e-05 | 0.0039  | 1,00E-04 |
| NA       | 19.36  | 67.96   | 18.64   | 2.12e-05 | 0.0039  | 6,00E-04 |
| ANXA7    | 560.25 | 238.77  | 414.8   | 2.21e-05 | 0.00404 | 2,00E-04 |
| FLNA     | 155.42 | 166.59  | 385.92  | 2.37e-05 | 0.00429 | < 1e-07  |
| ACTN4    | 457.36 | 937.87  | 387.93  | 2.5e-05  | 0.00444 | 1,00E-04 |
| OAT      | 263.25 | 81.74   | 173.93  | 2.5e-05  | 0.00444 | 1,00E-04 |
| BST2     | 128.55 | 343.36  | 102.8   | 2.51e-05 | 0.00444 | 1,00E-04 |
| JAG1     | 30.04  | 90.86   | 33.39   | 2.58e-05 | 0.00453 | 2,00E-04 |
| PRSS2    | 45.94  | 451.13  | 43.42   | 2.61e-05 | 0.00453 | 6,00E-04 |
| CLN6     | 77.64  | 117.51  | 66.75   | 2.62e-05 | 0.00453 | < 1e-07  |
| CHPT1    | 399.03 | 94.19   | 278.59  | 2.77e-05 | 0.00475 | 2,00E-04 |
| HEXIM1   | 135.76 | 149.69  | 306.62  | 2.8e-05  | 0.00476 | 0.001    |
| SLC25A37 | 72.97  | 23.51   | 109.61  | 2.84e-05 | 0.00476 | < 1e-07  |
| NRIP1    | 553.12 | 90.65   | 790.47  | 2.84e-05 | 0.00476 | 5,00E-04 |
| DOCK2    | 251.06 | 70.56   | 215.97  | 2.92e-05 | 0.00482 | < 1e-07  |
| MAST4    | 301.14 | 584.5   | 309.92  | 2.92e-05 | 0.00482 | 1,00E-04 |
| ASPH     | 18.08  | 29.03   | 17.24   | 3.1e-05  | 0.00504 | 1,00E-04 |
| LPGAT1   | 50.76  | 23.22   | 39.61   | 3.1e-05  | 0.00504 | 1,00E-04 |
| NA       | 48.47  | 102.41  | 49.88   | 3.14e-05 | 0.00507 | 5,00E-04 |
| LTK      | 110.07 | 242.35  | 92.02   | 3.36e-05 | 0.00539 | 2,00E-04 |
| MICB     | 106.29 | 66.38   | 108.47  | 3.49e-05 | 0.00555 | 1,00E-04 |
| ADRA2A   | 37.21  | 31      | 281.65  | 3.53e-05 | 0.00558 | < 1e-07  |
| NOTCH2   | 493.74 | 177.7   | 311.3   | 3.56e-05 | 0.00559 | < 1e-07  |
| KDELC1   | 23.35  | 78.3    | 24.17   | 3.62e-05 | 0.00564 | 4,00E-04 |
| GOLGA9P  | 991.51 | 3223.55 | 593.57  | 3.7e-05  | 0.00573 | 5,00E-04 |
| NIPSNAP1 | 223.85 | 121.82  | 205.38  | 3.75e-05 | 0.00576 | 1,00E-04 |
| A2BP1    | 58.45  | 400.05  | 55.03   | 3.8e-05  | 0.0058  | 0.001    |
| GGA3     | 107.64 | 147.06  | 108.58  | 3.86e-05 | 0.00585 | 2,00E-04 |
| LTK      | 142.15 | 280.18  | 121.99  | 4.09e-05 | 0.00616 | 4,00E-04 |
| FABP5    | 355.07 | 627.85  | 162.01  | 4.16e-05 | 0.00618 | 1,00E-04 |
| GYPC     | 925.32 | 315.52  | 767.47  | 4.16e-05 | 0.00618 | 1,00E-04 |
| CACNB2   | 33.38  | 357.85  | 25.16   | 4.43e-05 | 0.00648 | 8,00E-04 |
| RUNX1T1  | 22.09  | 41.24   | 31.37   | 4.46e-05 | 0.00648 | 1,00E-04 |
| FAH      | 127.19 | 385.63  | 130.65  | 4.46e-05 | 0.00648 | 3,00E-04 |
| CHSY1    | 202.69 | 490.5   | 175.59  | 4.48e-05 | 0.00648 | 3,00E-04 |
| KHK      | 97.74  | 163.87  | 104.7   | 4.62e-05 | 0.00664 | 5,00E-04 |
| GATM     | 67.3   | 139.49  | 64.06   | 5.01e-05 | 0.00712 | 2,00E-04 |
| CD300C   | 48.44  | 70.16   | 49.11   | 5.02e-05 | 0.00712 | 6,00E-04 |
| S100A6   | 1311.2 | 373.01  | 975.15  | 5.11e-05 | 0.00721 | 3,00E-04 |
| CHD4     | 607.94 | 971.38  | 614.85  | 5.19e-05 | 0.00727 | 2,00E-04 |
| SPINK2   | 127.78 | 1484.05 | 71.18   | 5.29e-05 | 0.00737 | 7,00E-04 |
| IRS2     | 292.1  | 147.15  | 1678.29 | 5.47e-05 | 0.00757 | 5,00E-04 |
| CD59     | 314.46 | 162.25  | 183.74  | 5.53e-05 | 0.00761 | < 1e-07  |
| DALRD3   | 209.73 | 431.91  | 272.48  | 5.66e-05 | 0.00774 | 3,00E-04 |
| EXPH5    | 103.63 | 244.97  | 100.67  | 5.75e-05 | 0.00781 | 8,00E-04 |
| ZNF706   | 713.64 | 441.94  | 762.87  | 5.84e-05 | 0.00789 | 1,00E-04 |
| PRKCA    | 57.01  | 127.01  | 123.68  | 5.91e-05 | 0.00793 | 5,00E-04 |
| CYB5R4   | 272.21 | 114.87  | 176.22  | 6.02e-05 | 0.00798 | 4,00E-04 |
| NRIP1    | 600.13 | 119.43  | 889.69  | 6.02e-05 | 0.00798 | 5,00E-04 |
| C5orf4   | 90.27  | 86.48   | 209.52  | 6.15e-05 | 0.00806 | 0.001    |
| CLEC11A  | 337.4  | 683.16  | 225.08  | 6.15e-05 | 0.00806 | < 1e-07  |
| CLEC11A  | 380.81 | 941.81  | 221.82  | 6.38e-05 | 0.00831 | 1,00E-04 |
| NA       | 28.56  | 49.02   | 27.81   | 6.43e-05 | 0.00833 | 7,00E-04 |

|          |         |         |          |           |         |          |
|----------|---------|---------|----------|-----------|---------|----------|
| TRAM1    | 729.23  | 477.04  | 707.75   | 6.5e-05   | 0.00837 | 3,00E-04 |
| CAMK2G   | 269.61  | 663.15  | 274.79   | 6.57e-05  | 0.00841 | 5,00E-04 |
| GSTM5    | 177.62  | 475.37  | 168.98   | 6.75e-05  | 0.00859 | 4,00E-04 |
| TGFA     | 71.89   | 111.2   | 72.2     | 6.8e-05   | 0.00861 | 2,00E-04 |
| MT1F     | 391.24  | 941.55  | 339.8    | 7.06e-05  | 0.00889 | 1,00E-04 |
| PLXNA3   | 87.34   | 140.78  | 85.33    | 7.19e-05  | 0.009   | 1,00E-04 |
| GP5      | 22.04   | 21.15   | 122.13   | 7.42e-05  | 0.00921 | < 1e-07  |
| CREG1    | 615.26  | 213.9   | 461      | 7.46e-05  | 0.00921 | 4,00E-04 |
| SCN9A    | 13.64   | 30.49   | 13.54    | 7.48e-05  | 0.00921 | 6,00E-04 |
| WASF1    | 34.29   | 97.57   | 30.05    | 7.66e-05  | 0.00935 | 4,00E-04 |
| GPX1     | 890.27  | 291.91  | 996.19   | 7.68e-05  | 0.00935 | 7,00E-04 |
| C10orf26 | 153.5   | 517.37  | 146.83   | 7.75e-05  | 0.00939 | 5,00E-04 |
| MAP4K1   | 283.25  | 121.3   | 203.21   | 7.84e-05  | 0.00944 | 2,00E-04 |
| MAN2A2   | 690.28  | 298.69  | 620.61   | 7.89e-05  | 0.00945 | 4,00E-04 |
| PDGFD    | 70.23   | 141.78  | 65.28    | 8,00E-05  | 0.00953 | 4,00E-04 |
| PIP5K1C  | 277.07  | 490.31  | 275.63   | 8.1e-05   | 0.0096  | 5,00E-04 |
| EAF2     | 303.34  | 95.6    | 152.83   | 8.16e-05  | 0.00962 | 1,00E-04 |
| GPX7     | 156.44  | 48.2    | 112.71   | 8.27e-05  | 0.00969 | 1,00E-04 |
| ZNF443   | 117.53  | 182.11  | 108.91   | 8.31e-05  | 0.00969 | 4,00E-04 |
| UNC5B    | 106.89  | 163.11  | 95.96    | 8.48e-05  | 0.0098  | 4,00E-04 |
| PPBP     | 188.52  | 52.45   | 2304.39  | 8.49e-05  | 0.0098  | 6,00E-04 |
| HDAC1    | 322.26  | 192.92  | 276.81   | 8.57e-05  | 0.00984 | 1,00E-04 |
| AMD1     | 445.14  | 183.26  | 316.66   | 8.62e-05  | 0.00985 | 5,00E-04 |
| MAP4K1   | 264.72  | 128.6   | 201.07   | 8.77e-05  | 0.00997 | 2,00E-04 |
| PRRG1    | 23.76   | 33.91   | 24.88    | 8.87e-05  | 0.00998 | 4,00E-04 |
| APOB48R  | 79.76   | 126.12  | 77.22    | 8.91e-05  | 0.00998 | 3,00E-04 |
| COL4A5   | 20.83   | 46.11   | 24.28    | 8.96e-05  | 0.00998 | 6,00E-04 |
| SEMA4D   | 332.77  | 788.96  | 574.8    | 8.96e-05  | 0.00998 | 1,00E-04 |
| GP1BA    | 133     | 12.09   | 520.65   | 9.19e-05  | 0.0101  | 4,00E-04 |
| MAP4K1   | 304.15  | 137.54  | 223.85   | 9.22e-05  | 0.0101  | 3,00E-04 |
| ZNF253   | 84.01   | 109.7   | 86.21    | 9.26e-05  | 0.0101  | 2,00E-04 |
| ITM2A    | 693.71  | 5335.63 | 1153.59  | 9.33e-05  | 0.0101  | 2,00E-04 |
| TNF      | 122.83  | 298.3   | 219.44   | 9.33e-05  | 0.0101  | 4,00E-04 |
| NA       | 14.75   | 22.58   | 14.14    | 9.4e-05   | 0.0102  | 7,00E-04 |
| SORT1    | 72.55   | 124.84  | 84.05    | 9.59e-05  | 0.0103  | 4,00E-04 |
| SLC16A1  | 39.86   | 31.99   | 47.36    | 9.68e-05  | 0.0104  | < 1e-07  |
| SOX11    | 31.8    | 186.17  | 145.9    | 9.77e-05  | 0.0104  | 6,00E-04 |
| PRDX2    | 330.59  | 46.15   | 456.44   | 9.9e-05   | 0.0105  | 3,00E-04 |
| NA       | 1516.64 | 172.34  | 13060.39 | 9.96e-05  | 0.0105  | 8,00E-04 |
| AK1      | 54.26   | 32.49   | 102.17   | 0.0001006 | 0.0106  | 2,00E-04 |
| ISCA1    | 181.15  | 81.59   | 351.93   | 0.0001009 | 0.0106  | 5,00E-04 |
| FAM127B  | 130.27  | 223.42  | 159.2    | 0.000105  | 0.0109  | 1,00E-04 |
| SLC43A1  | 241.45  | 152.69  | 170.11   | 0.0001084 | 0.0112  | 6,00E-04 |
| DHRS7    | 347     | 650.03  | 299.83   | 0.0001106 | 0.0114  | 6,00E-04 |
| MKRN3    | 60.06   | 81.39   | 59.11    | 0.0001119 | 0.0115  | 3,00E-04 |
| PF4      | 326.02  | 166.74  | 3028.82  | 0.0001211 | 0.0124  | 8,00E-04 |
| RHOF     | 142.8   | 237.43  | 257.15   | 0.0001215 | 0.0124  | 1,00E-04 |
| NP       | 314.89  | 866.03  | 435.79   | 0.0001221 | 0.0124  | 9,00E-04 |
| TMSB15A  | 70.45   | 230.54  | 105.8    | 0.000123  | 0.0124  | 8,00E-04 |
| HSD17B11 | 583.73  | 249.74  | 341.45   | 0.0001234 | 0.0124  | 6,00E-04 |
| GABBR1   | 330.59  | 748.48  | 418.81   | 0.0001236 | 0.0124  | 4,00E-04 |
| STAC     | 265.29  | 468.53  | 180.29   | 0.0001248 | 0.0124  | 4,00E-04 |
| SMAD3    | 271.8   | 658.54  | 237.13   | 0.000125  | 0.0124  | 2,00E-04 |
| PRSS3    | 155.98  | 242.52  | 149.01   | 0.0001268 | 0.0125  | 6,00E-04 |
| RASIP1   | 76.2    | 131.31  | 68.87    | 0.0001284 | 0.0126  | 5,00E-04 |
| GSPT2    | 106.05  | 59.67   | 97.11    | 0.0001313 | 0.0128  | 5,00E-04 |
| MPPED2   | 13.23   | 20.82   | 13.26    | 0.0001319 | 0.0128  | 8,00E-04 |
| CBLB     | 90.28   | 90.17   | 224.25   | 0.0001324 | 0.0128  | 9,00E-04 |
| MT1F     | 417.44  | 1021.48 | 362.2    | 0.000133  | 0.0128  | 3,00E-04 |
| PDXK     | 132     | 92.83   | 131.19   | 0.0001334 | 0.0128  | 1,00E-04 |
| ABCD4    | 108.51  | 166.23  | 105.46   | 0.0001345 | 0.0128  | 4,00E-04 |

|           |         |         |          |           |        |          |
|-----------|---------|---------|----------|-----------|--------|----------|
| CMAH      | 252.56  | 39.65   | 81.84    | 0.0001351 | 0.0128 | 0.0011   |
| H2AFY     | 164.37  | 709.97  | 108.24   | 0.0001352 | 0.0128 | 2,00E-04 |
| FAM189A1  | 21.77   | 39.46   | 24.91    | 0.000138  | 0.013  | 6,00E-04 |
| NA        | 1500.43 | 168.87  | 14600.49 | 0.000139  | 0.0131 | 0.0011   |
| LOC644617 | 287.19  | 151.95  | 215.64   | 0.0001405 | 0.0132 | 3,00E-04 |
| CLEC11A   | 523.73  | 1300.96 | 345.37   | 0.0001424 | 0.0133 | < 1e-07  |
| PPP1R13B  | 42.56   | 65.08   | 47.34    | 0.000143  | 0.0133 | 3,00E-04 |
| CAMK2G    | 121.88  | 260.32  | 116.15   | 0.0001461 | 0.0135 | 6,00E-04 |
| MPG       | 262.9   | 155.49  | 203.14   | 0.0001463 | 0.0135 | 2,00E-04 |
| SOX11     | 32.09   | 119.44  | 82.25    | 0.0001505 | 0.0138 | 6,00E-04 |
| CRLF3     | 289.53  | 187.78  | 478.07   | 0.0001515 | 0.0138 | 5,00E-04 |
| NENF      | 501.86  | 182.2   | 343.2    | 0.0001525 | 0.0139 | 2,00E-04 |
| GNLY      | 133.1   | 1217.87 | 150.66   | 0.0001554 | 0.0141 | 9,00E-04 |
| PHACTR2   | 133.34  | 64.41   | 123.82   | 0.0001596 | 0.0143 | 7,00E-04 |
| JUP       | 537.4   | 791.13  | 284.22   | 0.0001597 | 0.0143 | < 1e-07  |
| LPIN2     | 255.43  | 151.13  | 321.57   | 0.0001601 | 0.0143 | 6,00E-04 |
| KANK1     | 49.95   | 348.78  | 64.36    | 0.0001607 | 0.0143 | 0.0014   |
| CSF1      | 130.63  | 191.17  | 130.75   | 0.000161  | 0.0143 | 3,00E-04 |
| ANXA7     | 701.43  | 343.81  | 500      | 0.000162  | 0.0143 | 5,00E-04 |
| MCF2L     | 134.13  | 171.83  | 186.21   | 0.0001636 | 0.0144 | 3,00E-04 |
| MT1G      | 365.86  | 870.74  | 349.56   | 0.0001638 | 0.0144 | 1,00E-04 |
| SIAH2     | 562.01  | 205.42  | 617.8    | 0.0001668 | 0.0146 | 3,00E-04 |
| EMID1     | 448.47  | 174.37  | 242.58   | 0.0001696 | 0.0147 | 9,00E-04 |
| IFITM2    | 3278.52 | 1481.39 | 3070.89  | 0.0001697 | 0.0147 | 6,00E-04 |
| ITM2A     | 195.76  | 1741.55 | 359.12   | 0.0001705 | 0.0147 | 5,00E-04 |
| PHACTR2   | 213.57  | 82.36   | 216.66   | 0.0001717 | 0.0148 | 6,00E-04 |
| CPPED1    | 22.38   | 16.31   | 17.82    | 0.0001765 | 0.0151 | 2,00E-04 |
| NA        | 36.51   | 59.66   | 39.86    | 0.0001782 | 0.0152 | 6,00E-04 |
| NTHL1     | 63.28   | 104.82  | 50.49    | 0.0001796 | 0.0153 | 6,00E-04 |
| SOX11     | 19.32   | 109.2   | 93.03    | 0.0001812 | 0.0153 | 9,00E-04 |
| SLC4A4    | 18.17   | 57.46   | 21.97    | 0.0001814 | 0.0153 | 0.0011   |
| GALNT11   | 59.63   | 106.07  | 99.78    | 0.0001822 | 0.0153 | 0.001    |
| GNLY      | 153.9   | 1343.35 | 175.09   | 0.0001847 | 0.0155 | 0.001    |
| VIM       | 5387.49 | 1150.9  | 3117.26  | 0.0001875 | 0.0156 | 8,00E-04 |
| NBL1      | 87.28   | 160.41  | 73.58    | 0.000188  | 0.0156 | 3,00E-04 |
| JAKMIP2   | 41.96   | 87.95   | 33.75    | 0.0001882 | 0.0156 | 0.0012   |
| VASH1     | 42.2    | 33      | 76.35    | 0.0001897 | 0.0156 | 7,00E-04 |
| UBAC1     | 274.37  | 95.35   | 232.34   | 0.0001905 | 0.0156 | 7,00E-04 |
| RGS10     | 469.4   | 112.78  | 960.7    | 0.0001906 | 0.0156 | 7,00E-04 |
| ACTN1     | 478.36  | 1126.68 | 739.22   | 0.0001952 | 0.0159 | 0.0011   |
| TMEM164   | 517.25  | 1491.47 | 587.47   | 0.0001955 | 0.0159 | 5,00E-04 |
| FHL1      | 549.36  | 104.98  | 448.04   | 0.0001977 | 0.016  | 0.0016   |
| PLA2G16   | 51.25   | 75.37   | 48.87    | 0.0002002 | 0.0161 | 0.0011   |
| MAP4      | 162.55  | 224.07  | 133.23   | 0.0002003 | 0.0161 | 1,00E-04 |
| GSN       | 417.41  | 2304.25 | 720.38   | 0.000204  | 0.0164 | 6,00E-04 |
| CYTL1     | 176.69  | 44.26   | 76.64    | 0.0002052 | 0.0164 | 0.0011   |
| ALAS2     | 173.67  | 101.23  | 699.4    | 0.0002066 | 0.0164 | 0.0016   |
| UNC5B     | 238.79  | 321.91  | 237.97   | 0.000209  | 0.0166 | 1,00E-04 |
| CALML4    | 58.88   | 87.77   | 69.52    | 0.0002103 | 0.0166 | 3,00E-04 |
| GIPC1     | 129.89  | 201.82  | 146.09   | 0.0002162 | 0.0169 | 5,00E-04 |
| SLC4A4    | 154.03  | 247.68  | 159.57   | 0.0002162 | 0.0169 | 5,00E-04 |
| DCPS      | 67.1    | 91.14   | 56.42    | 0.0002167 | 0.0169 | 2,00E-04 |
| HEXIM1    | 85.95   | 94.85   | 207.81   | 0.000217  | 0.0169 | 0.0018   |
| NA        | 1315.73 | 159     | 11040.15 | 0.0002184 | 0.0169 | 0.0012   |
| MAPKAPK2  | 514.3   | 275.47  | 434.92   | 0.0002196 | 0.0169 | 6,00E-04 |
| FGD6      | 25.01   | 35.37   | 27.24    | 0.0002197 | 0.0169 | 3,00E-04 |
| DEPDC6    | 342.47  | 99.31   | 108.1    | 0.0002216 | 0.017  | 8,00E-04 |
| NA        | 930.34  | 1328.66 | 890.97   | 0.0002222 | 0.017  | 3,00E-04 |
| BAMBI     | 126.46  | 608.37  | 75.9     | 0.0002235 | 0.0171 | 0.0014   |
| GNB5      | 101.44  | 90.84   | 223.12   | 0.0002248 | 0.0171 | < 1e-07  |
| ANXA2     | 1270.01 | 325.13  | 713.93   | 0.0002323 | 0.0176 | 0.001    |

|            |         |         |         |           |        |          |
|------------|---------|---------|---------|-----------|--------|----------|
| UNC84A     | 43.21   | 32.84   | 51.86   | 0.0002359 | 0.0178 | 1,00E-04 |
| CCND2      | 72.12   | 229.2   | 59.31   | 0.000243  | 0.0183 | 6,00E-04 |
| IL6ST      | 51.46   | 52.12   | 123.07  | 0.0002449 | 0.0184 | 8,00E-04 |
| ABHD2      | 115.57  | 57.41   | 88.13   | 0.0002461 | 0.0184 | 5,00E-04 |
| SELENBP1   | 117.99  | 41.36   | 237.83  | 0.0002469 | 0.0184 | 0.001    |
| WSB2       | 146.35  | 95.99   | 165.2   | 0.0002479 | 0.0184 | 5,00E-04 |
| IFT122     | 155.85  | 166.03  | 98.45   | 0.000248  | 0.0184 | 0.0018   |
| KCNN4      | 175.55  | 78.13   | 155.11  | 0.0002508 | 0.0185 | 5,00E-04 |
| ERG        | 110.61  | 195.49  | 88.32   | 0.0002623 | 0.0192 | 9,00E-04 |
| SMAD5      | 12.79   | 15.93   | 13.64   | 0.0002634 | 0.0192 | 2,00E-04 |
| NA         | 419.79  | 615.44  | 379.46  | 0.0002636 | 0.0192 | 5,00E-04 |
| ANK3       | 14.79   | 14.9    | 46.36   | 0.0002643 | 0.0192 | 0.0034   |
| SLC25A14   | 149.81  | 186.55  | 136.12  | 0.0002678 | 0.0194 | 2,00E-04 |
| UCP2       | 874.76  | 316.69  | 1083.87 | 0.0002719 | 0.0196 | 0.0015   |
| RASSF2     | 226.71  | 87.54   | 217.35  | 0.0002723 | 0.0196 | 0.0015   |
| NINJ2      | 166.07  | 489.3   | 187.06  | 0.0002745 | 0.0197 | 0.0011   |
| MXRA7      | 212.42  | 865.53  | 233.65  | 0.0002764 | 0.0198 | 0.0013   |
| CACNB2     | 69.6    | 456.31  | 50.56   | 0.0002782 | 0.0199 | 0.002    |
| TJP2       | 59.02   | 215.3   | 135.65  | 0.0002811 | 0.02   | 0.001    |
| ANXA2      | 1259.84 | 337.88  | 700.5   | 0.0002825 | 0.02   | 9,00E-04 |
| NA         | 40.92   | 50.28   | 41.68   | 0.0002831 | 0.02   | < 1e-07  |
| NRGN       | 287.74  | 549.9   | 1218.82 | 0.0002859 | 0.0202 | 7,00E-04 |
| LAMA5      | 124.74  | 97.46   | 228.87  | 0.0002966 | 0.0208 | 0.0012   |
| MARCH8     | 221.33  | 170.12  | 358.25  | 0.0003039 | 0.0213 | 0.0012   |
| AMD1       | 514.22  | 210.41  | 338.06  | 0.0003045 | 0.0213 | 8,00E-04 |
| ANXA2      | 1248.1  | 345.21  | 684.34  | 0.0003056 | 0.0213 | 0.0012   |
| TMOD1      | 166.15  | 81.5    | 180.98  | 0.0003071 | 0.0213 | 0.0016   |
| ADAMTS3    | 24.77   | 74.11   | 30.82   | 0.0003077 | 0.0213 | 0.0014   |
| CMAH       | 178.73  | 54.25   | 75.45   | 0.0003155 | 0.0218 | 0.0022   |
| NRP1       | 40.1    | 61.47   | 40.82   | 0.0003169 | 0.0218 | 4,00E-04 |
| SLC25A37   | 154.61  | 85.55   | 226.71  | 0.0003209 | 0.022  | 5,00E-04 |
| ASMTL      | 136.38  | 88.46   | 70.19   | 0.0003268 | 0.0223 | 4,00E-04 |
| UCP2       | 1102.47 | 299.09  | 1714.7  | 0.0003299 | 0.0224 | 0.0019   |
| CNNM3      | 302.82  | 209.9   | 323.78  | 0.00033   | 0.0224 | 8,00E-04 |
| ETS2       | 366.05  | 638.8   | 201.07  | 0.0003328 | 0.0225 | 8,00E-04 |
| JAG1       | 23.34   | 37.66   | 24.29   | 0.0003344 | 0.0226 | 0.0017   |
| ELK3       | 74.32   | 36.42   | 57.64   | 0.000336  | 0.0226 | 7,00E-04 |
| BUB3       | 229.61  | 406.86  | 251.36  | 0.0003404 | 0.0228 | 6,00E-04 |
| CPD        | 191.66  | 113.19  | 148.8   | 0.0003465 | 0.0232 | 0.0013   |
| ST6GALNAC4 | 70.85   | 50.29   | 73.4    | 0.0003516 | 0.0235 | 3,00E-04 |
| ABCA5      | 58.69   | 85.3    | 72.96   | 0.0003536 | 0.0235 | 2,00E-04 |
| PGF        | 42.34   | 74.75   | 44.67   | 0.000356  | 0.0236 | 0.0013   |
| GRPEL1     | 148.98  | 99.5    | 195.65  | 0.0003584 | 0.0237 | 7,00E-04 |
| FYN        | 35.19   | 30.2    | 51.29   | 0.0003624 | 0.0239 | 5,00E-04 |
| PECAM1     | 388.68  | 881.39  | 932.73  | 0.0003637 | 0.0239 | 0.0015   |
| PSMF1      | 75.38   | 47.89   | 67.26   | 0.0003769 | 0.0247 | 5,00E-04 |
| GNAZ       | 112.35  | 102.59  | 220.33  | 0.0003868 | 0.0252 | 0.0012   |
| LILRA3     | 41.79   | 40.64   | 68.57   | 0.0003877 | 0.0252 | 5,00E-04 |
| ELF4       | 310.13  | 547.5   | 277.78  | 0.0003901 | 0.0252 | 0.0011   |
| BACE1      | 79.76   | 144.92  | 84      | 0.0003903 | 0.0252 | 0.0011   |
| MED27      | 212.97  | 255.49  | 228.73  | 0.0003907 | 0.0252 | 1,00E-04 |
| CPZ        | 63.41   | 95.74   | 63.57   | 0.0003966 | 0.0255 | 0.001    |
| CD59       | 363.99  | 167.16  | 188.45  | 0.0003971 | 0.0255 | 0.0011   |
| EHD3       | 61.94   | 31.44   | 127.05  | 0.0003981 | 0.0255 | 0.0013   |
| RAB4A      | 194.95  | 83.05   | 101.83  | 0.0004026 | 0.0257 | 0.001    |
| ITPR1      | 129.07  | 55.94   | 89.38   | 0.0004039 | 0.0257 | 3,00E-04 |
| BRD2       | 1113.72 | 1740.93 | 1626.07 | 0.0004047 | 0.0257 | 3,00E-04 |
| ASS1       | 75.12   | 244     | 73      | 0.0004067 | 0.0257 | 0.0016   |
| NCRNA00081 | 50.52   | 36.73   | 67.45   | 0.0004095 | 0.0258 | 8,00E-04 |
| DNAJC6     | 107.63  | 29.09   | 88.02   | 0.0004167 | 0.0262 | 7,00E-04 |
| PTPRC      | 1648.34 | 808.6   | 1906.99 | 0.0004171 | 0.0262 | 0.0016   |

|          |         |         |         |           |        |          |
|----------|---------|---------|---------|-----------|--------|----------|
| LPCAT4   | 40.31   | 68.36   | 33.21   | 0.0004185 | 0.0262 | 8,00E-04 |
| PTGER2   | 95.01   | 31.8    | 56.02   | 0.0004209 | 0.0263 | 0.0011   |
| PDCD4    | 42.31   | 24.39   | 47.6    | 0.0004253 | 0.0265 | 5,00E-04 |
| NA       | 28.91   | 38.53   | 28.8    | 0.000438  | 0.0272 | 3,00E-04 |
| GNB5     | 77.31   | 53.9    | 246.83  | 0.0004395 | 0.0272 | 6,00E-04 |
| BNIP3    | 61.32   | 101.53  | 68.24   | 0.0004405 | 0.0272 | 0.001    |
| RBPJ     | 810.22  | 1435.58 | 891.66  | 0.0004472 | 0.0275 | 7,00E-04 |
| AUH      | 48.11   | 104.98  | 55.93   | 0.0004642 | 0.0285 | 0.0016   |
| NA       | 102.73  | 138.72  | 111.5   | 0.0004677 | 0.0286 | 6,00E-04 |
| LRFN4    | 100.14  | 154.18  | 78.86   | 0.0004719 | 0.0288 | 7,00E-04 |
| ITGB3    | 98.84   | 104.54  | 404.37  | 0.0004772 | 0.0291 | 0.0022   |
| TLE4     | 56.78   | 179.14  | 76.59   | 0.0004797 | 0.0291 | 0.0013   |
| PITPNC1  | 101.38  | 282.46  | 182.05  | 0.0004798 | 0.0291 | 0.0013   |
| DACT1    | 29.48   | 26.14   | 43.12   | 0.000484  | 0.0291 | 0.0011   |
| FECH     | 359.53  | 162.45  | 355.32  | 0.0004844 | 0.0291 | 0.0015   |
| TFR2     | 445.46  | 63.63   | 290.49  | 0.0004845 | 0.0291 | 0.001    |
| NA       | 236.41  | 402.44  | 219.56  | 0.000487  | 0.0292 | 0.0018   |
| INPP5A   | 201.57  | 109.41  | 251.42  | 0.0004966 | 0.0297 | 0.0015   |
| GAS2L1   | 44.24   | 32.83   | 59.64   | 0.0005018 | 0.0299 | 5,00E-04 |
| MMD      | 109.82  | 189.19  | 214.13  | 0.000507  | 0.0301 | 7,00E-04 |
| ELL2     | 32.71   | 45.8    | 33.55   | 0.0005204 | 0.0308 | 6,00E-04 |
| TALDO1   | 1244.43 | 404.32  | 905.74  | 0.0005259 | 0.031  | 0.0017   |
| SLITRK5  | 58.36   | 212.61  | 68.16   | 0.0005266 | 0.031  | 0.0023   |
| CHD4     | 341.4   | 579.01  | 383.69  | 0.0005274 | 0.031  | 0.001    |
| PGAP2    | 210.17  | 150.24  | 175.39  | 0.0005288 | 0.031  | 4,00E-04 |
| PTPRC    | 699.9   | 301.02  | 759.35  | 0.0005326 | 0.0311 | 0.0011   |
| BRD2     | 829.14  | 1298.54 | 1248.91 | 0.0005393 | 0.0315 | 0.0011   |
| STAT5B   | 443.09  | 239.86  | 429.56  | 0.0005426 | 0.0316 | 0.0019   |
| PGCP     | 208.6   | 117.99  | 161.11  | 0.000545  | 0.0316 | 0.001    |
| CYP2E1   | 46.84   | 92.09   | 43.6    | 0.0005489 | 0.0318 | 0.0021   |
| CD44     | 442.63  | 2201.88 | 448.64  | 0.0005522 | 0.0319 | 0.0016   |
| CD44     | 501     | 1952.15 | 474.57  | 0.0005579 | 0.0321 | 0.0016   |
| CLCN3    | 20.59   | 16.06   | 33.71   | 0.0005585 | 0.0321 | 0.0017   |
| TCF7L2   | 118.9   | 230.66  | 116.09  | 0.0005599 | 0.0321 | 0.0013   |
| RNF219   | 29.3    | 61.7    | 33.32   | 0.0005669 | 0.0324 | 0.0016   |
| WT1      | 64.14   | 251.84  | 66.72   | 0.0005677 | 0.0324 | 0.0023   |
| RRP1B    | 168.74  | 66.27   | 171.33  | 0.0005862 | 0.0333 | 0.0018   |
| VEZF1    | 222.55  | 101.98  | 186.04  | 0.0005877 | 0.0333 | 7,00E-04 |
| ZNF174   | 74.62   | 88.51   | 69.98   | 0.0005916 | 0.0334 | 3,00E-04 |
| TCEA1    | 1082.78 | 637.71  | 839.77  | 0.0005933 | 0.0334 | 0.0016   |
| WT1      | 90.2    | 223.36  | 74.56   | 0.0005941 | 0.0334 | 0.0021   |
| GATA3    | 133.96  | 393.62  | 227.43  | 0.0006042 | 0.0339 | 0.0021   |
| ADD3     | 198.2   | 102.55  | 531.7   | 0.0006048 | 0.0339 | 0.001    |
| RAB38    | 72.88   | 189.57  | 87.8    | 0.0006113 | 0.034  | 0.0015   |
| MT2A     | 1383.71 | 4501.08 | 1085.55 | 0.000613  | 0.034  | 0.0016   |
| CYP2E1   | 17.78   | 25.36   | 16.34   | 0.0006138 | 0.034  | 0.0015   |
| EFHD2    | 251.1   | 121.02  | 196.5   | 0.0006141 | 0.034  | 0.0019   |
| PER2     | 88.06   | 45.13   | 62.82   | 0.0006199 | 0.0343 | 0.0018   |
| FBXO22   | 36.35   | 43.61   | 35.51   | 0.000625  | 0.0345 | 2,00E-04 |
| CLCN3    | 157.11  | 91.31   | 228.66  | 0.0006265 | 0.0345 | 0.001    |
| GNB5     | 89.22   | 82.64   | 239.46  | 0.0006357 | 0.0349 | 3,00E-04 |
| MT1X     | 208.53  | 681.25  | 163.32  | 0.0006382 | 0.0349 | 6,00E-04 |
| TACC1    | 894.36  | 451.69  | 1142.86 | 0.0006385 | 0.0349 | 0.0017   |
| CTSH     | 184.62  | 697.2   | 241.72  | 0.0006568 | 0.0358 | 0.002    |
| GTPBP3   | 126.16  | 157.16  | 120.81  | 0.0006706 | 0.0364 | 6,00E-04 |
| SPOCK1   | 51.2    | 220.51  | 57.22   | 0.0006727 | 0.0365 | 0.0027   |
| SLC3A2   | 361.49  | 555.37  | 398.87  | 0.0006807 | 0.0368 | 5,00E-04 |
| HS3ST3A1 | 13.74   | 14.24   | 36.01   | 0.0006817 | 0.0368 | 0.0023   |
| PTGER3   | 58.02   | 38.81   | 100.39  | 0.0006896 | 0.0371 | 0.0015   |
| SMAD3    | 212.52  | 432.59  | 150.91  | 0.0006933 | 0.0372 | 0.0012   |
| RGS10    | 74.5    | 56.95   | 90.93   | 0.0006951 | 0.0372 | 0.0013   |

|          |         |         |         |           |        |          |
|----------|---------|---------|---------|-----------|--------|----------|
| MCF2L    | 167.72  | 213.87  | 222.94  | 0.0006989 | 0.0373 | 0.0016   |
| SEPP1    | 41.07   | 210.09  | 37.02   | 0.0006996 | 0.0373 | 0.002    |
| FAM176B  | 141.06  | 214.72  | 133.83  | 0.0007036 | 0.0374 | 0.0022   |
| BICC1    | 43.55   | 70.69   | 40.16   | 0.0007046 | 0.0374 | 0.0011   |
| CYP2E1   | 36.92   | 66.27   | 36.02   | 0.0007166 | 0.0379 | 0.0018   |
| KIAA0323 | 312.34  | 195.06  | 348.99  | 0.0007186 | 0.0379 | 0.0021   |
| LONRF3   | 76.23   | 93.33   | 74.03   | 0.0007219 | 0.038  | 4,00E-04 |
| SYNCRIP  | 834.17  | 434.97  | 686.62  | 0.000725  | 0.038  | 0.0015   |
| VPS37C   | 98.9    | 90.2    | 146.89  | 0.0007256 | 0.038  | 0.0012   |
| WNK1     | 462.83  | 645.34  | 694.71  | 0.0007257 | 0.038  | 9,00E-04 |
| IL6ST    | 92.21   | 85.59   | 344.42  | 0.0007369 | 0.0385 | 0.0023   |
| GAPDHS   | 27.76   | 35.2    | 26.28   | 0.0007562 | 0.0394 | 0.002    |
| USP18    | 41.25   | 49.41   | 61.03   | 0.0007625 | 0.0396 | 7,00E-04 |
| BLVRA    | 373.42  | 164.85  | 422.77  | 0.0007757 | 0.0401 | 0.0017   |
| CD9      | 365.44  | 64.22   | 873.26  | 0.0007757 | 0.0401 | 0.0029   |
| INSIG2   | 34.87   | 69.45   | 38.35   | 0.0007796 | 0.0401 | 0.0022   |
| SLC16A1  | 32.34   | 22.58   | 33.84   | 0.0007812 | 0.0401 | 8,00E-04 |
| EPS8L1   | 89.33   | 110.54  | 74.2    | 0.0007825 | 0.0401 | 8,00E-04 |
| ATP9A    | 39.85   | 92.35   | 31.94   | 0.000783  | 0.0401 | 0.0013   |
| PMP22    | 56.63   | 106.9   | 61.72   | 0.0007883 | 0.0403 | 0.0018   |
| DAZAP2   | 2133.73 | 1310.73 | 2061.67 | 0.0007974 | 0.0405 | 0.0022   |
| FAM190B  | 164.4   | 243.05  | 188.4   | 0.0008011 | 0.0405 | 0.0015   |
| MT1X     | 785.95  | 2448.32 | 592.46  | 0.0008015 | 0.0405 | 0.0013   |
| PLOD1    | 129.19  | 94.78   | 122.02  | 0.0008021 | 0.0405 | 0.0014   |
| PLXNC1   | 160.91  | 51.83   | 69.34   | 0.0008031 | 0.0405 | 0.0012   |
| ELL2     | 96.91   | 331.86  | 104.78  | 0.0008032 | 0.0405 | 0.002    |
| ZNF93    | 110.66  | 186.83  | 121.78  | 0.0008065 | 0.0406 | 0.0017   |
| BMP2     | 117.98  | 901.48  | 64.46   | 0.0008084 | 0.0406 | 0.0025   |
| ABLIM1   | 333.55  | 93.28   | 605     | 0.0008246 | 0.0411 | 0.0021   |
| RNF138   | 468.15  | 288.56  | 510.98  | 0.0008247 | 0.0411 | 0.0013   |
| CXXC4    | 52.28   | 82.83   | 49.65   | 0.0008287 | 0.0411 | 0.001    |
| SLC24A3  | 18.97   | 30.7    | 34.61   | 0.0008287 | 0.0411 | 0.0025   |
| SPI1     | 191.85  | 99.07   | 151.11  | 0.0008327 | 0.0411 | 0.0016   |
| ARHGEF3  | 93.35   | 108.37  | 282.93  | 0.0008335 | 0.0411 | 0.0018   |
| CD53     | 1465.81 | 449.24  | 1463.04 | 0.0008344 | 0.0411 | 0.0022   |
| PLXNB2   | 323.68  | 901.62  | 399.72  | 0.0008344 | 0.0411 | 0.0029   |
| NA       | 192.96  | 183.1   | 376.77  | 0.0008427 | 0.0413 | 4,00E-04 |
| AMMECR1  | 109.39  | 44.24   | 140.39  | 0.0008433 | 0.0413 | 0.0025   |
| GAMT     | 125.67  | 79.76   | 86.7    | 0.0008443 | 0.0413 | 0.0021   |
| SMAD3    | 146.97  | 293.58  | 116.73  | 0.0008553 | 0.0418 | 0.0018   |
| ERG      | 141.27  | 476.69  | 71.92   | 0.000863  | 0.0421 | 0.0022   |
| MAP4     | 143.37  | 187.07  | 125.07  | 0.0008691 | 0.0423 | 0.0014   |
| FRY      | 63.64   | 25.69   | 58.46   | 0.0008834 | 0.0429 | 0.0031   |
| SLC35F2  | 85.11   | 60.48   | 73.33   | 0.0009027 | 0.0437 | 0.0016   |
| NA       | 463.65  | 276.72  | 547.38  | 0.0009155 | 0.0443 | 0.0022   |
| IRF5     | 232.35  | 433.54  | 203.63  | 0.0009191 | 0.0443 | 0.0018   |
| SLC24A3  | 58.65   | 164.38  | 166.29  | 0.0009337 | 0.0449 | 0.0032   |
| DIAPH2   | 61.49   | 100.86  | 53.23   | 0.0009413 | 0.045  | 0.0015   |
| PRR5L    | 17.4    | 27.86   | 13.77   | 0.0009436 | 0.045  | 0.0019   |
| FYB      | 123     | 133.47  | 323.56  | 0.0009437 | 0.045  | 0.0026   |
| C21orf96 | 425.09  | 945.06  | 429.05  | 0.0009439 | 0.045  | 0.0024   |
| CHMP7    | 95.95   | 95.08   | 242.94  | 0.0009483 | 0.0452 | 0.0011   |
| ITPR1    | 47.18   | 29.43   | 37.77   | 0.0009558 | 0.0454 | 0.0017   |
| MAB21L1  | 23.5    | 20.91   | 76.86   | 0.0009727 | 0.0461 | 7,00E-04 |
| TAX1BP3  | 186.67  | 418.85  | 307.34  | 0.0009815 | 0.0464 | 0.0024   |
| SRGAP3   | 49.5    | 62.2    | 43.49   | 0.0009863 | 0.0466 | 0.0012   |

FDR, false discovery rate. List of genes differentially expressed between OTT-MAL, CBFA2T3-GLIS2, and other non-DS AMKLs.



**Table S2.** Intersection between RNA-seq and microarray expression analyses

| Gene name                                        | Fold change |             |
|--------------------------------------------------|-------------|-------------|
|                                                  | RNA-seq     | Microarrays |
| <b>Common signature of CBFA2T3-GLIS2 samples</b> |             |             |
| <i>TNFAIP3</i>                                   | 11.8        | 2.941176471 |
| <i>LTC4S</i>                                     | 12.01       | 9.090909091 |
| <i>MDFIC</i>                                     | 14.45       | 2.380952381 |
| <i>HOPX</i>                                      | 14.52       | 11.36363636 |
| <i>GNLY</i>                                      | 16.38       | 9.090909091 |
| <i>ALX3</i>                                      | 16.83       | 3.125       |
| <i>GATA3</i>                                     | 18.21       | 2.941176471 |
| <i>SPINK2</i>                                    | 21.67       | 13.15789474 |
| <i>SLC4A4</i>                                    | 24.71       | 3.03030303  |
| <i>IGFBP7</i>                                    | 27.1        | 8.333333333 |
| <i>CD3D</i>                                      | 35.93       | 3.225806452 |
| <i>SPOCK1</i>                                    | 55.88       | 4.166666667 |
| <i>CLSTN2</i>                                    | 74.09       | 2.564102564 |
| <i>BMP2</i>                                      | 87.99       | 8.333333333 |
| <i>NCAM1</i>                                     | 201.67      | 35.71428571 |
| <i>ACE2</i>                                      | 206.34      | 9.090909091 |
| <i>DOK5</i>                                      | 515.78      | 5.882352941 |
| <b>Common signature of OTT-MAL samples</b>       |             |             |
| <i>CCND2</i>                                     | -9,227.26   | -3.25       |
| <i>CD53</i>                                      | -7,140.66   | 4.545454545 |
| <i>SMAD3</i>                                     | -5,352.23   | -4.45       |
| <i>MFNG</i>                                      | -2,787.57   | 4.545454545 |
| <i>PRKCH</i>                                     | -1,173.24   | 5.882352941 |
| <i>ERG</i>                                       | -1,005.42   | -10.27      |
| <i>INSR</i>                                      | -897.55     | -2.23       |
| <i>HCLS1</i>                                     | -654.96     | 5.263157895 |
| <i>IGF2BP2</i>                                   | -228.38     | -7.3        |
| <i>IRF5</i>                                      | -172.91     | -2.04       |
| <i>PIK3CD</i>                                    | -158.26     | 3.703703704 |
| <i>ETS2</i>                                      | -137.74     | -4.36       |
| <i>ABLIM1</i>                                    | -100.54     | 10.63829787 |
| <i>TUBA4A</i>                                    | -91.21      | 3.333333333 |
| <i>HHEX</i>                                      | -52.07      | -3.5        |
| <i>GPR56</i>                                     | -32.51      | -3.89       |
| <i>MX2</i>                                       | 7.61        | 2           |
| <i>S100A6</i>                                    | 7.7         | 2.777777778 |
| <i>PARP12</i>                                    | 7.76        | 2.272727273 |
| <i>IFITM3</i>                                    | 11.22       | 2.631578947 |
| <i>AK1</i>                                       | 11.45       | 2.631578947 |
| <i>PRDX2</i>                                     | 16.35       | 10.52631579 |
| <i>IFITM1</i>                                    | 17.03       | 4.761904762 |
| <i>IRS2</i>                                      | 40.16       | 9.090909091 |
